# Supplementary material for: Striking dual functionality of a novel Pd@Eu-MOF nanocatalyst in C(sp2)–C(sp2) bond-forming and CO2 fixation reactions
Source: Royal Society of Chemistry journal article supplement (doi:10.1039/d0dt00770f), 2020-01-01

## Electronic Supporting Information

### Striking dual functionality of the novel Pd@Eu-MOF nanocatalyst in C(sp<sup>2</sup>)-C(sp<sup>2</sup>) bond-forming and CO<sub>2</sub> fixation reactions

Li-Xin You,<sup>a</sup> Shan-Xin Yao,<sup>a</sup> Bai-Bei Zhao,<sup>a</sup> Gang Xiong,<sup>a</sup> Ileana Dragutan,<sup>b</sup> Valerian Dragutan,<sup>\*b</sup> Xue-Gui Liu,<sup>c</sup> Fu Ding<sup>a</sup> and Ya-Guang Sun<sup>\*a</sup>

<sup>a</sup>Key Laboratory of Inorganic Molecule-Based Chemistry of Liaoning Province, Shenyang University of Chemical Technology, Shenyang 110142, China. E-mail: sunyaguang@syuct.edu.cn.

<sup>b</sup>Institute of Organic Chemistry, Romanian Academy, Bucharest, P. O. Box 35-108, 060023, Romania. E-mail: vdragutan@yahoo.com.

<sup>c</sup>Institute of Functional Molecules, Shenyang University of Chemical Technology, Shenyang 110142, China

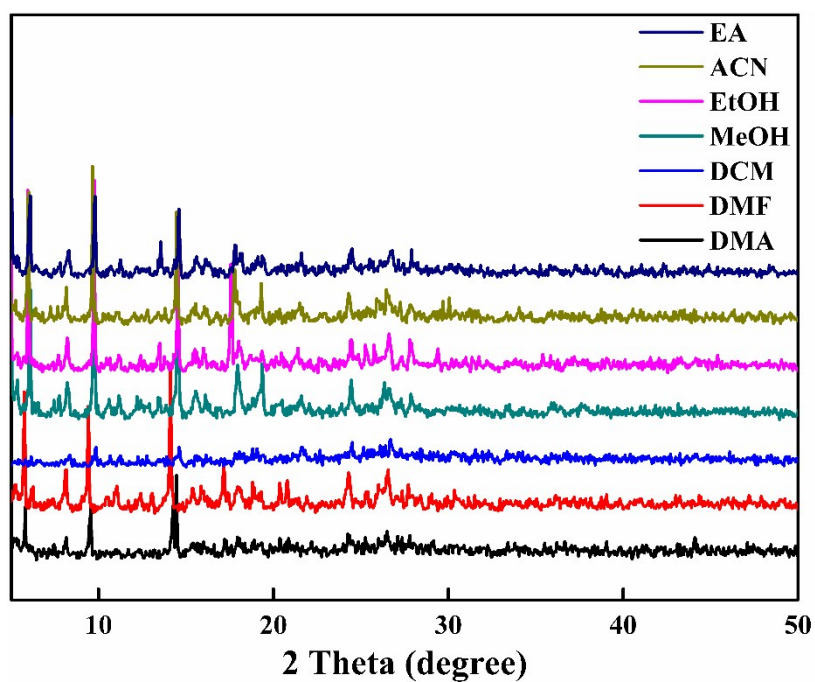

**Fig. S1** PXRD of Eu-MOF after being suspended in different solvents for 12 h.

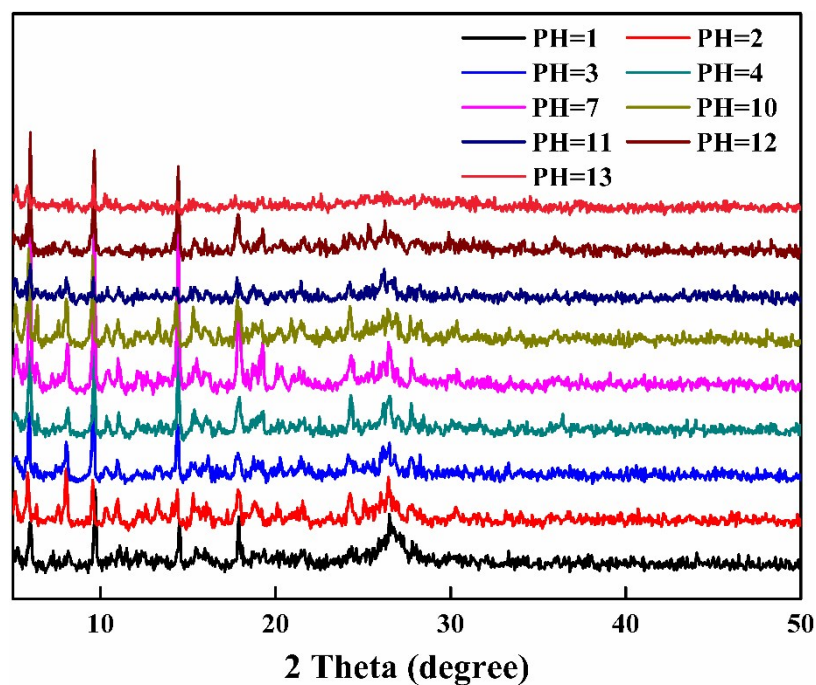

**Fig. S2** PXRD of Eu-MOF after being suspended in aqueous sodium hydroxide and hydrochloric conditions, under specific pH value for 12 h.

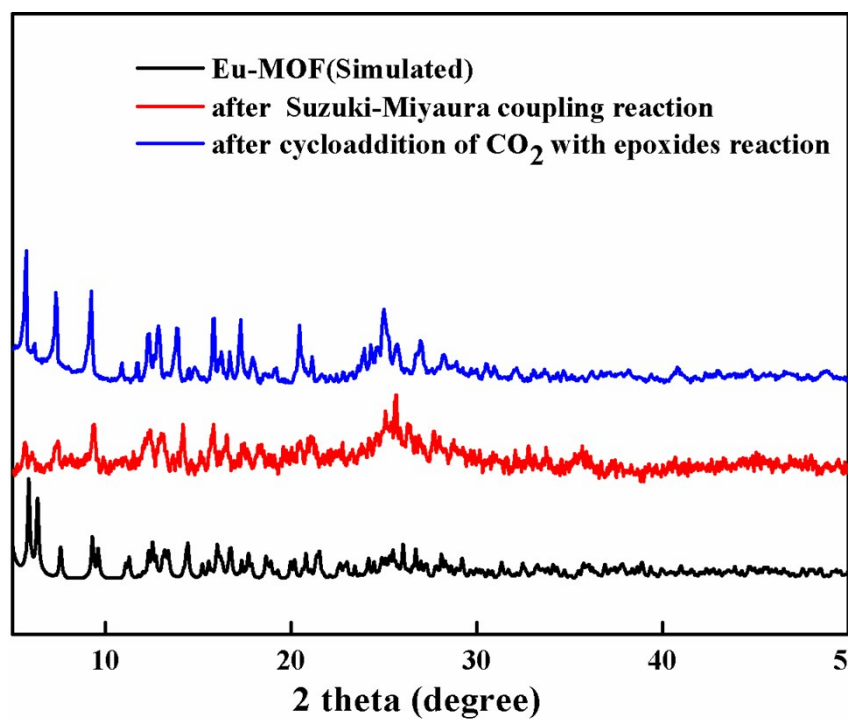

**Fig. S3** PXRD of Pd@Eu-MOF after the Suzuki-Miyaura coupling and cycloaddition of CO<sub>2</sub> with epoxide.

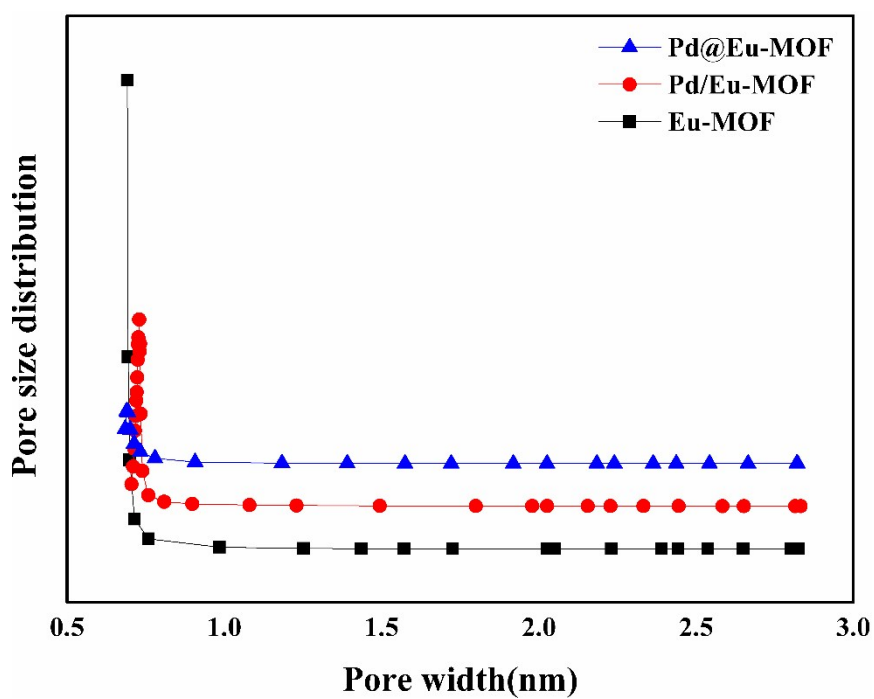

**Fig. S4** Pore size distribution of Pd@Eu-MOF, Pd/Eu-MOF and Eu-MOF.

**Table S1** Langmuir surface area of Eu-MOF, Pd/Eu-MOF and Pd@Eu-MOF.

| Sample                                    | Eu-MOF  | Pd/Eu-MOF | Pd@Eu-MOF |
|-------------------------------------------|---------|-----------|-----------|
| Langmuir surface area (m <sup>2</sup> /g) | 1361.22 | 1293.87   | 705.87    |

### GC-yield Standard Plots

#### GC-yield standard curve of biphenyl

The response peak area ratios of the product and the internal standard *n*-hexadecane ( $A_p/A_d$ ) were obtained from Agilent 7890A GC spectrometer.

|           |        |        |        |        |        |        |
|-----------|--------|--------|--------|--------|--------|--------|
| $A_p/A_d$ | 0.0806 | 0.2106 | 0.4497 | 0.6333 | 0.6953 | 0.7448 |
| Yields    | 0.1    | 0.30   | 0.60   | 0.81   | 0.90   | 1.00   |

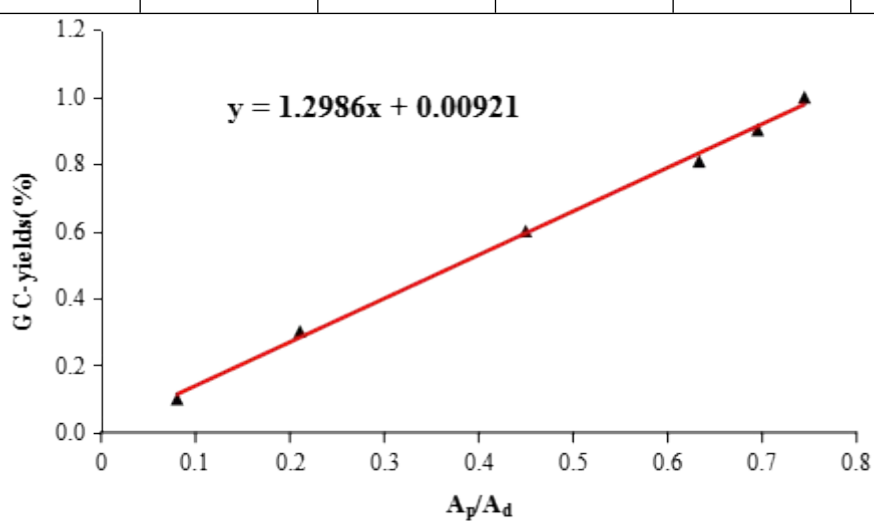

### GC-yield standard curve of 4-methoxybiphenyl

The response peak area ratios of the product and the internal standard *n*-hexadecane ( $A_p/A_d$ ) were obtained from Agilent 7890A GC spectrometer.

|           |        |        |        |        |        |        |
|-----------|--------|--------|--------|--------|--------|--------|
| $A_p/A_d$ | 0.0833 | 0.2243 | 0.4362 | 0.6207 | 0.7095 | 0.7776 |
| Yields    | 0.1    | 0.30   | 0.60   | 0.80   | 0.90   | 1.00   |

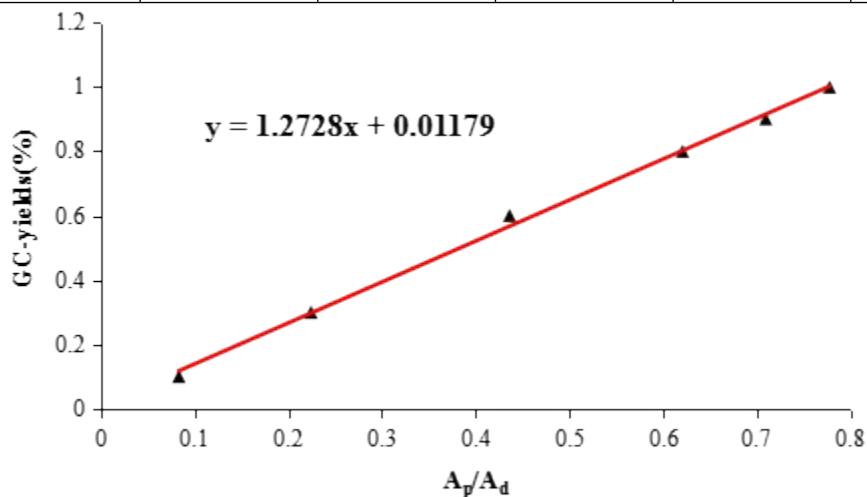

### GC-yield standard curve of 4-phenylacetophenone

The response peak area ratios of the product and the internal standard *n*-hexadecane ( $A_p/A_d$ ) were obtained from Agilent 7890A GC spectrometer.

|           |        |        |        |        |        |        |
|-----------|--------|--------|--------|--------|--------|--------|
| $A_p/A_d$ | 0.0730 | 0.2305 | 0.4982 | 0.6735 | 0.7293 | 0.8697 |
| Yields    | 0.1    | 0.30   | 0.60   | 0.80   | 0.90   | 1.00   |

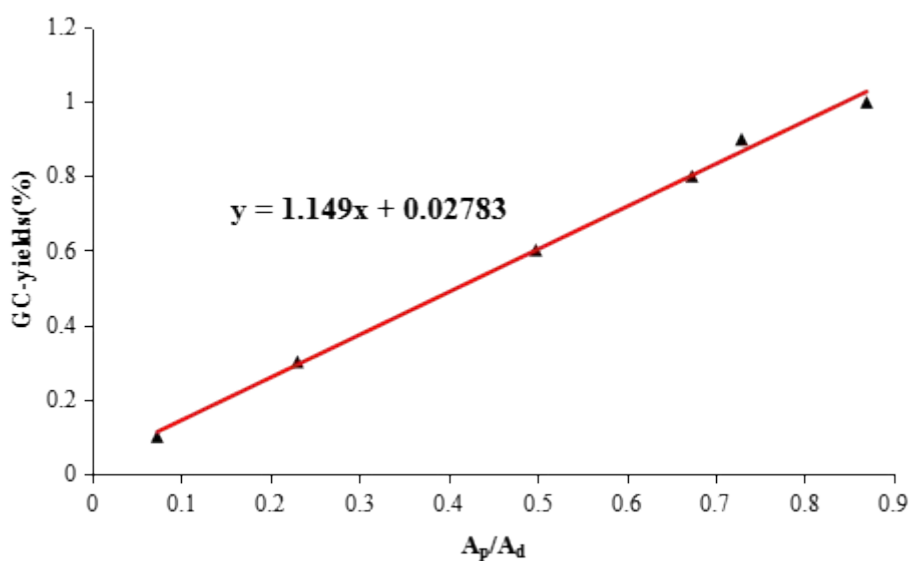

GC-yield standard curve of 4-chloromethyl-1,3-dioxolan-2-one

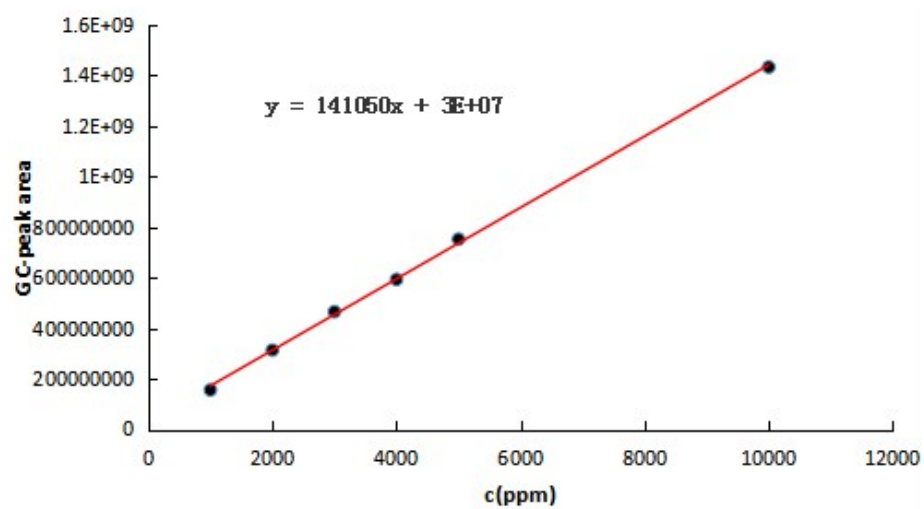

GC-yield standard curve of 4-methyl-1,3-dioxolan-2-one

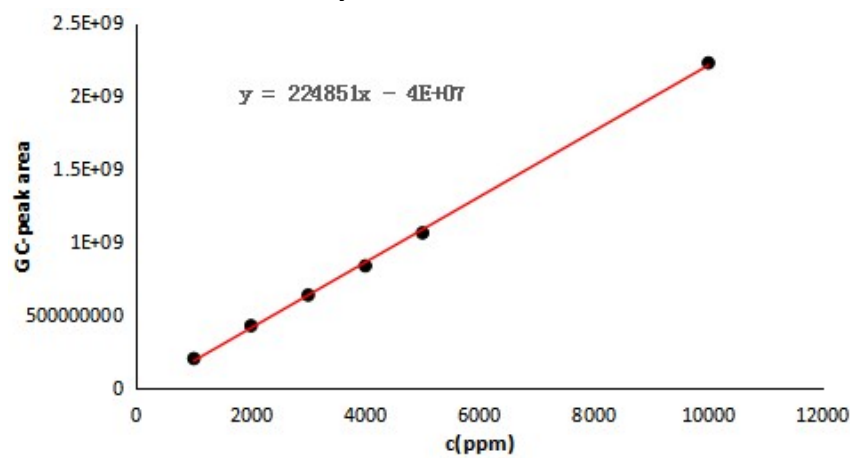

GC-yield standard curve of 4-ethyl-1,3-dioxolan-2-one

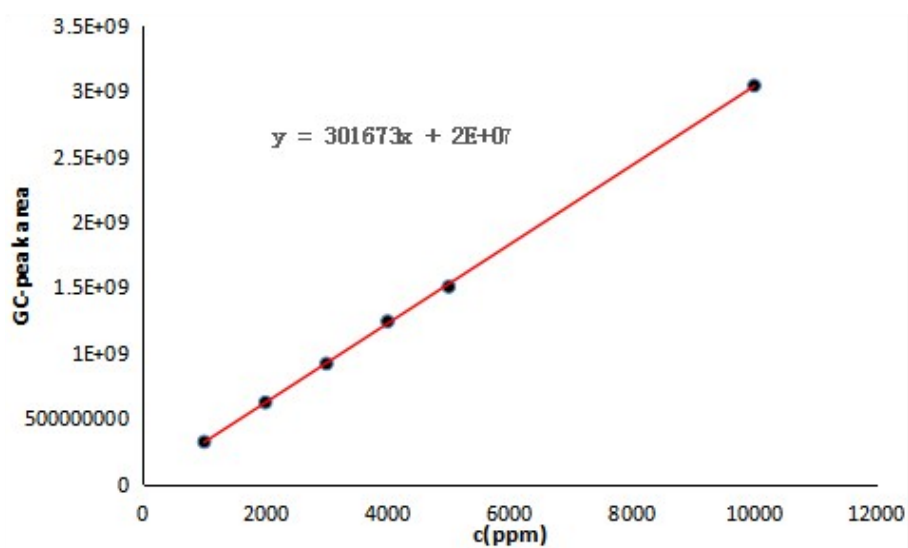

GC-yield standard curve of 4-phenyl-1,3-dioxolan-2-one

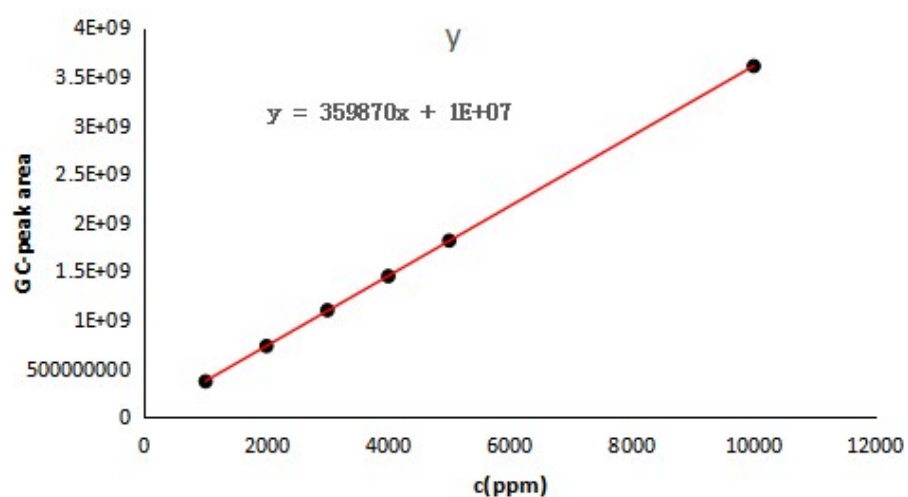

GC-yield standard curve of 4-butyl-1,3-dioxolan-2-one

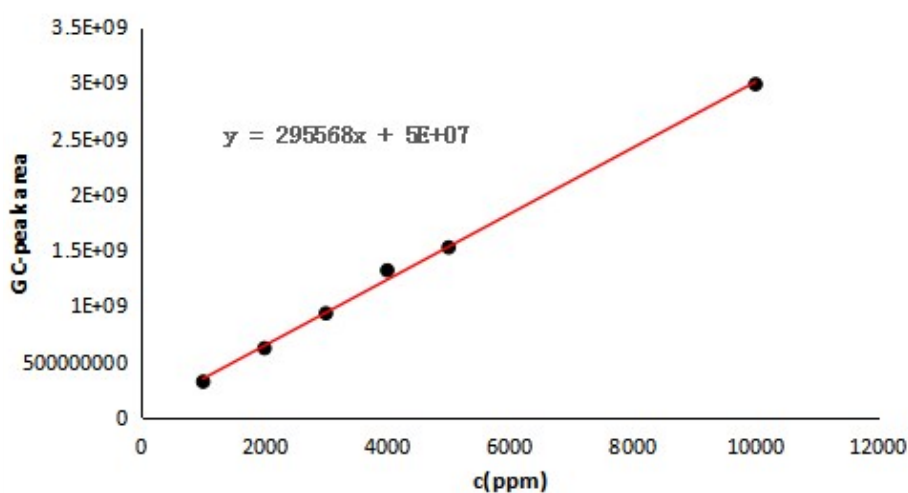

### <sup>1</sup>H NMR spectra of products

**Biphenyl:** <sup>1</sup>H NMR (500 MHz, d6-DMSO):  $\delta$  = 7.35 (t, 2H), 7.45(t, 4H), 7.64 (d, 4H).

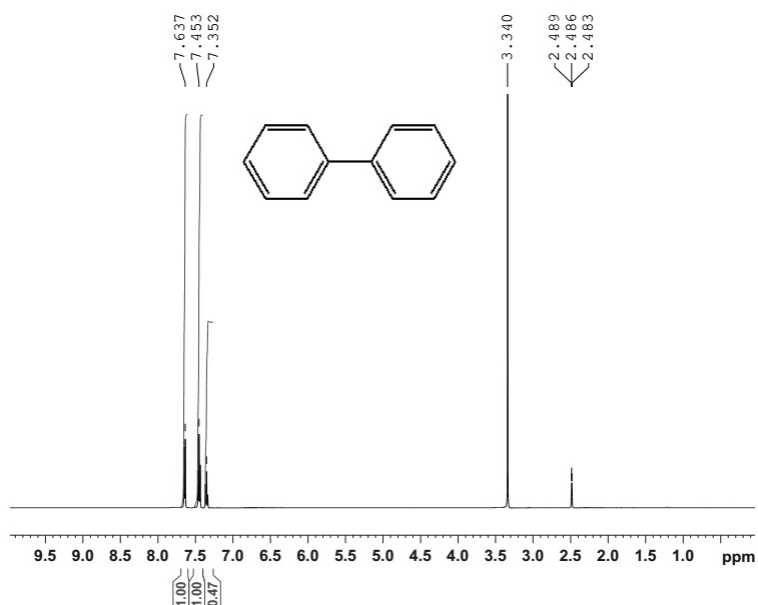

**4-Methyl-1,1'-biphenyl:** <sup>1</sup>H NMR (500 MHz, d6-DMSO):  $\delta$  = 2.33 (s, 3H), 7.26 (d, 2H), 7.32 (t, 1H), 7.43 (t, 2H), 7.53 (d, 2H), 7.61 (d, 2H).

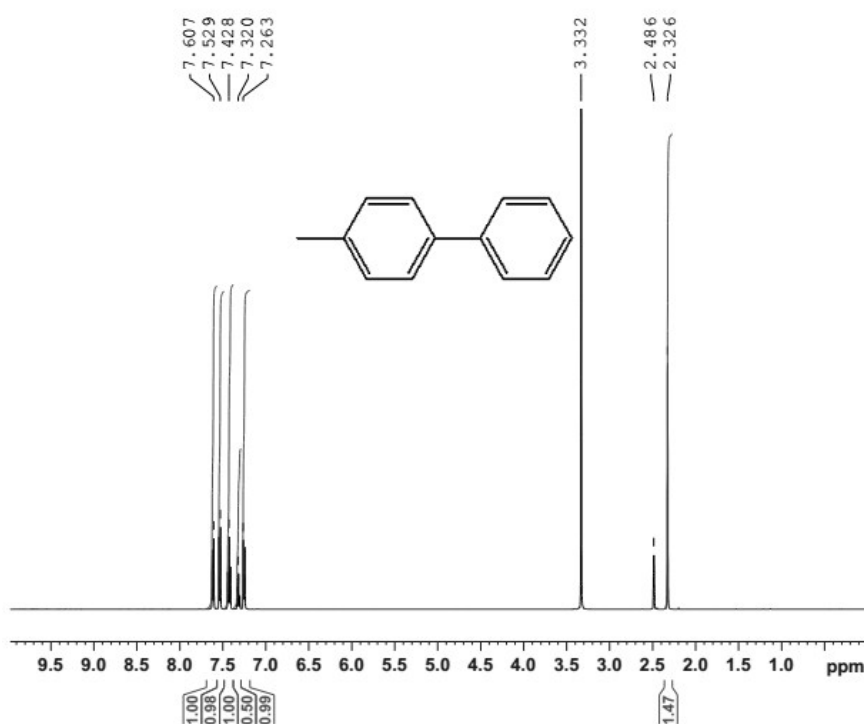



**4-Acetyl-1,1'-biphenyl:**  $^1\text{H}$  NMR (500 MHz,  $\text{d}_6\text{-DMSO}$ ):  $\delta$  = 2.60 (s, 3H), 7.42 (t, 2H), 7.50 (t, 2H), 7.73 (d, 2H), 7.82 (d, 2H), 8.03(d, 2H)

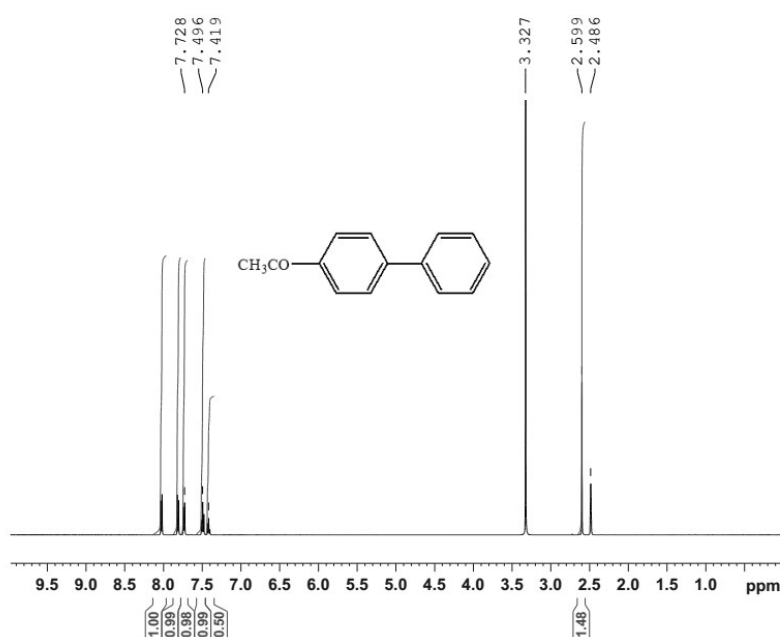

**4-Methyl-1,3-dioxolan-2-one:**  $^1\text{H}$  NMR (500 MHz,  $\text{CDCl}_3$ );  $\delta$ =1.47 (d, 3H), 4.01(t, 1H), 4.55(t, 1H), 4.84(m, 1H)

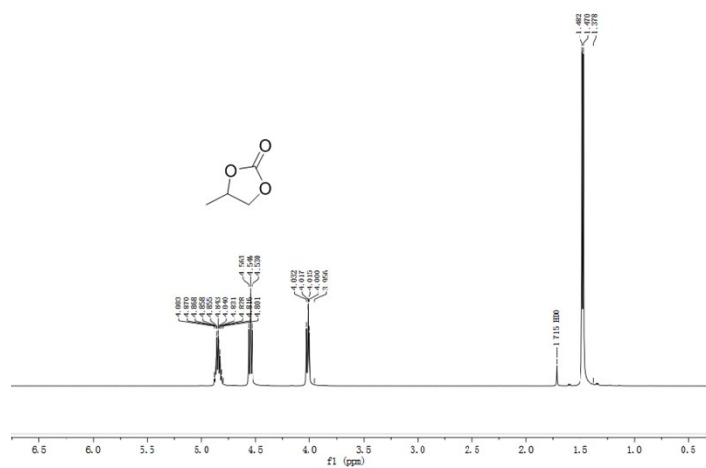

**4-Ethyl-1,3-dioxolan-2-one:**  $^1\text{H}$  NMR (500 MHz,  $\text{CDCl}_3$ )  $\delta$ =0.99 (t,3H), 1.75(m,2H ), 4.08 (dd,1H), 4.5 (t,1H), 4.65(m,1H).

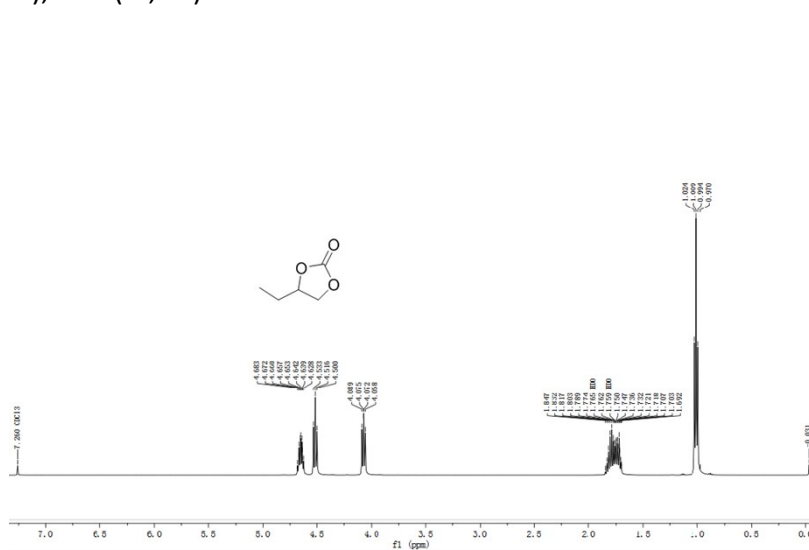

**4-Chloromethyl-1,3-dioxolan-2-one:**  $^1\text{H}$  NMR (500 MHz,  $\text{CDCl}_3$ ):  $\delta$ =3.72 (m,2H), 4.33 (dd,1H), 4.54 (t,1H), 4.98 (m, 1H)

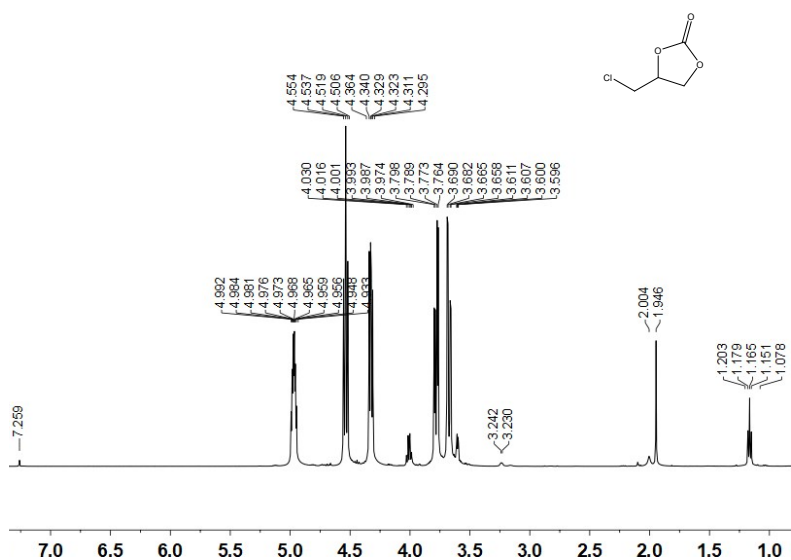

**4-Phenyl-1,3-dioxolan-2-one:**  $^1\text{H}$  NMR (500 MHz,  $\text{CDCl}_3$ ); 4.32 (t, 1H), 4.79 (t, 1H) 5.66 (t, 1H) 7.41(m, 5H)

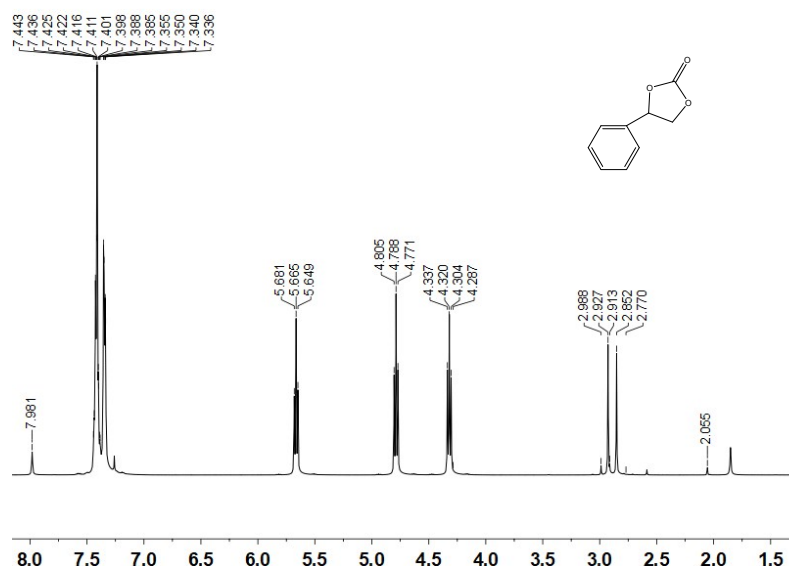

**4-Butyl-1,3-dioxolan-2-one:**  $^1\text{H}$  NMR (500 MHz,  $\text{CDCl}_3$ )  $\delta$ =0.81(t, 3H), 1.27 (m, 4H), 1.64 (m, 2H), 3.99(dd, 1H), 4.46 (t, 1H),4.62(m, 1H)

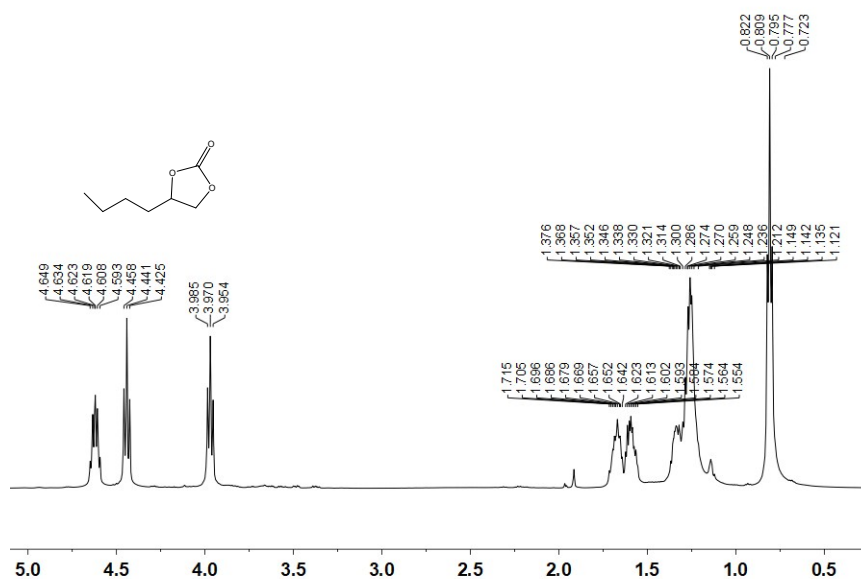

Supplement: d0dt00770f1.pdf [file d0dt00770f1.pdf]
